# Supplementary material for: Agreement between gastrointestinal panel testing and standard microbiology methods for detecting pathogens in suspected infectious gastroenteritis: Test evaluation and meta-analysis in the absence of a reference standard
Source: PLOS journal article supplement (doi:10.1371/journal.pone.0173196), 2017-03-02
Supplement: S6 (10.1371/journal.pone.0173196.s006) [file journal.pone.0173196.s006]

**S4 Table. Outcomes of verification of discordant results in 4 studies reporting outcomes of verification by pathogen using a third method**

| Study (GPP test)            | Pathogen                        | Comparator                           | Verification method (judgement of bias)               | Reported results of verification* |                                                 |                                                                      |
|-----------------------------|---------------------------------|--------------------------------------|-------------------------------------------------------|-----------------------------------|-------------------------------------------------|----------------------------------------------------------------------|
| Buss 2015[7]<br>(FilmArray) | Adenovirus 40/41                | 2x PCR                               | ECP (biased), BTFA (biased)                           | GPP +                             | Comparator +<br>42                              | Comparator –<br>13 (verified 11+/0,<br>2 remain inconclusive**) 1499 |
|                             |                                 |                                      |                                                       | GPP -                             | 2 (verified 1+/0,<br>1 remains inconclusive)    |                                                                      |
|                             | <i>C. difficile</i> toxin A/B   | 2x PCR                               | ECP (biased), BTFA (biased)                           | GPP +                             | Comparator +<br>163                             | Comparator –<br>41 (verified 41+/0)                                  |
|                             |                                 |                                      |                                                       | GPP -                             | 2 (verified 1+/0 and<br>1 remains inconclusive) | 1350                                                                 |
|                             | <i>Campylobacter</i>            | Culture                              | cadF and gyrA PCR (biased), BTFA (biased)             | GPP +                             | Comparator +<br>34                              | Comparator –<br>24 (verified 19+/0,<br>5 remain inconclusive) 1497   |
|                             |                                 |                                      |                                                       | GPP -                             | 1 (verified 1+/0)                               |                                                                      |
|                             | <i>Cryptosporidium</i>          | 2x PCR                               | ECP, 18S rRNA gene PCR (biased), BTFA (biased)        | GPP +                             | Comparator +<br>18                              | Comparator –<br>6 (verified 6+/0)                                    |
|                             |                                 |                                      |                                                       | GPP -                             | 0                                               | 1532                                                                 |
|                             | <i>E. coli</i> O157             | Culture (STEC positive only)         | rfbE PCR (biased)                                     | GPP +                             | Comparator +<br>3                               | Comparator –<br>1 (verified 1+/0)                                    |
|                             |                                 |                                      |                                                       | GPP -                             | 0                                               | 34                                                                   |
|                             | ETEC                            | 3x PCR                               | ECP (biased), BTFA (biased)                           | GPP +                             | Comparator +<br>22                              | Comparator –<br>9 (verified 6+/3-) 1525                              |
|                             |                                 |                                      |                                                       | GPP -                             | 0                                               |                                                                      |
|                             | <i>Giardia</i>                  | 2x PCR (one using published primers) | ECP (biased), BTFA (biased)                           | GPP +                             | Comparator +<br>20                              | Comparator –<br>7 (verified 4+/2-,<br>2 remain inconclusive) 1529    |
|                             |                                 |                                      |                                                       | GPP -                             | 0                                               |                                                                      |
|                             | Norovirus                       | PCR (using published primers)        | PCR with multiple primer sets (biased), BTFA (biased) | GPP +                             | Comparator +<br>52                              | Comparator –<br>18 (verified 8+/0,<br>10 remain inconclusive) 1483   |
|                             |                                 |                                      |                                                       | GPP -                             | 3 (verified 2+/0,<br>1 remains inconclusive)    |                                                                      |
|                             | <i>Plesiomonas shigelloides</i> | Culture                              | hugA PCR (biased), BTFA (biased)                      | GPP +                             | Comparator +<br>3                               | Comparator –<br>15 (verified 15+/0)                                  |
|                             |                                 |                                      |                                                       | GPP -                             | 0                                               | 1538                                                                 |
|                             | Rotavirus                       | 2x PCR                               | ECP (biased), BTFA (biased)                           | GPP +                             | Comparator +<br>6                               | Comparator –<br>12 (verified 11+/0,<br>1 remains inconclusive)       |
|                             |                                 |                                      |                                                       | GPP -                             | 0                                               | 1538                                                                 |

| Study (GPP test)     | Pathogen               | Comparator                                                        | Verification method (judgement of bias)                                                                                             | Reported results of verification*            |                                                                                  |  |
|----------------------|------------------------|-------------------------------------------------------------------|-------------------------------------------------------------------------------------------------------------------------------------|----------------------------------------------|----------------------------------------------------------------------------------|--|
|                      | <i>Salmonella</i>      | Culture                                                           | stn PCR (biased)                                                                                                                    | GPP + 31<br>GPP - 0                          | Comparator +<br>Comparator – 6 (verified 6+/0)<br>1519                           |  |
|                      | <i>Shigella</i>        | Culture                                                           | ECP (biased), BTFA (biased)                                                                                                         | GPP + 47<br>GPP - 2 (2 remain inconclusive)  | Comparator +<br>Comparator – 2 (2 remain inconclusive)<br>1505                   |  |
|                      | STEC                   | 2x PCR                                                            | ECP (biased), BTFA (biased)                                                                                                         | GPP + 33<br>GPP - 0                          | Comparator +<br>Comparator – 5 (verified 5+/0)<br>1518                           |  |
|                      | <i>Vibrio cholerae</i> | Culture                                                           | gyrB PCR (biased), BTFA (biased)                                                                                                    | GPP + 0<br>GPP - 0                           | Comparator +<br>Comparator – 1 (verified 1+/0)<br>1555                           |  |
|                      | <i>Vibrio</i> spp.     | Culture                                                           | gyrB PCR (biased), BTFA (biased)                                                                                                    | GPP + 0<br>GPP - 0                           | Comparator +<br>Comparator – 2 (verified 2+/0)<br>1554                           |  |
|                      | EAEC                   | 2x PCR                                                            | ECP (biased), BTFA (biased)                                                                                                         | GPP + 82<br>GPP - 1 (1 remains inconclusive) | Comparator +<br>Comparator – 27 (verified 27+/0)<br>1446                         |  |
|                      | EPEC                   | 2x PCR (of samples that were STEC negative)                       | ECP (biased), BTFA (biased)                                                                                                         | GPP + 314<br>GPP - 3 (3 remain inconclusive) | Comparator +<br>Comparator – 34 (verified 23+/0, 11 remain inconclusive)<br>1167 |  |
|                      | Astrovirus             | PCR                                                               | ECP (biased), BTFA (biased)                                                                                                         | GPP + 7<br>GPP - 0                           | Comparator +<br>Comparator – 1 (verified 1+/0)<br>1548                           |  |
|                      | Sapovirus              | 2x PCR (one with published primers and one with in-house primers) | ECP (biased), BTFA (biased)                                                                                                         | GPP + 46<br>GPP - 0                          | Comparator +<br>Comparator – 13 (verified 12+/0, 1 remains inconclusive)<br>1497 |  |
| Deng 2015[10] (xTAG) | Adenovirus 40/41       | Immunochromatography                                              | Singleplex PCR and sequencing with primers specific for conserved regions of each target sourced from published literature (biased) | GPP + 3<br>GPP - 2 (verified 0/2-)           | Comparator +<br>Comparator – 0<br>285                                            |  |
|                      | <i>Campylobacter</i>   | Culture                                                           | Singleplex PCR and sequencing with primers specific for conserved regions of each target sourced                                    | GPP + 20<br>GPP - 0                          | Comparator +<br>Comparator – 16 (verified 16+/0)<br>254                          |  |

| Study (GPP test) | Pathogen           | Comparator                                                   | Verification method (judgement of bias)                                                                                               | Reported results of verification* |                                         |                                           |
|------------------|--------------------|--------------------------------------------------------------|---------------------------------------------------------------------------------------------------------------------------------------|-----------------------------------|-----------------------------------------|-------------------------------------------|
|                  |                    |                                                              | from published literature (biased)                                                                                                    |                                   |                                         |                                           |
|                  | <i>E.coli</i> O157 | Culture confirmed by gene sequencing using published primers | Singleplex PCR and sequencing with primers specific for conserved regions of each target sourced from published literature (biased)   | GPP +<br>GPP -                    | Comparator +<br>1<br>0                  | Comparator –<br>2 (verified 2+/0)<br>287  |
|                  | ETEC               | Culture confirmed by gene sequencing using published primers | Singleplex PCR and sequencing with primers specific for conserved regions of each target sourced from published literature (biased)   | GPP +<br>GPP -                    | Comparator +<br>1<br>0                  | Comparator –<br>4 (verified 4+/0)<br>285  |
|                  | Norovirus GII      | Real-time reverse transcription PCR using PCR kit            | Singleplex PCR and sequencing with primers specific for conserved regions of each target sourced from published literature (biased)   | GPP +<br>GPP -                    | Comparator +<br>37<br>2 (verified 0/2+) | Comparator –<br>3 (verified 0/3-)<br>248  |
|                  | Rotavirus          | Immunochromatography                                         | Singleplex PCR and sequencing with primers specific for conserved regions of each target sourced from published literature (unbiased) | GPP +<br>GPP -                    | Comparator +<br>61<br>1 (verified 0/1-) | Comparator –<br>6 (verified 6+/0)<br>222  |
|                  | <i>Salmonella</i>  | Culture confirmed by serotyping                              | Singleplex PCR and sequencing with primers specific for conserved regions of each target sourced from published literature (biased)   | GPP +<br>GPP -                    | Comparator +<br>25<br>5 (verified 5+/0) | Comparator –<br>6 (verified 3+/3-)<br>254 |
|                  | <i>Shigella</i>    | Culture confirmed by serotyping                              | Singleplex PCR and sequencing with                                                                                                    | GPP +                             | Comparator +<br>3                       | Comparator –<br>1 (verified 1+/0)         |

| Study (GPP test)       | Pathogen                      | Comparator                                                                                                                                                 | Verification method (judgement of bias)                                                                                                                                                                              | Reported results of verification* |                                                                               |
|------------------------|-------------------------------|------------------------------------------------------------------------------------------------------------------------------------------------------------|----------------------------------------------------------------------------------------------------------------------------------------------------------------------------------------------------------------------|-----------------------------------|-------------------------------------------------------------------------------|
|                        |                               |                                                                                                                                                            | primers specific for conserved regions of each target sourced from published literature (biased)                                                                                                                     | GPP - 0                           | 286                                                                           |
| FDA 2012[12]<br>(xTAG) | Adenovirus                    | EIA and one PCR/ sequencing assay                                                                                                                          | Bi-directional sequencing analysis using analytically validated primers that targeted genomic regions distinct from the xTAG GPP (biased)                                                                            | GPP + 4<br>GPP - 1 (1+/0)         | Comparator + 13<br>Comparator – 1154                                          |
|                        | <i>C. difficile</i> toxin A/B | Bartels Cytotoxicity Assay for Clostridium difficile Toxin                                                                                                 | Bi-directional sequencing analysis using analytically validated primers that targeted genomic regions distinct from the xTAG GPP (biased), <b>or</b> FDA cleared <i>C. difficile</i> Toxin molecular assays (biased) | GPP + 107<br>GPP - 7              | Comparator + 105 (verified 48+/0, 57 remain inconclusive)<br>Comparator – 922 |
|                        | <i>Campylobacter</i>          | Culture<br>(A PCR/Sequencing assay was also performed directly on clinical specimens that were tested positive by culture for species identification only) | Bi-directional sequencing analysis using analytically validated primers that targeted genomic regions distinct from the xTAG GPP (biased)                                                                            | GPP + 3<br>GPP - 0                | Comparator + 21 (verified 6+/0, 15 remain inconclusive)<br>Comparator – 1155  |
|                        | <i>Cryptosporidium</i>        | Microscopy                                                                                                                                                 | Bi-directional sequencing analysis using analytically validated primers that targeted genomic regions distinct from the xTAG GPP (biased)                                                                            | GPP + 12<br>GPP - 1               | Comparator + 53 (verified 8+/0, 45 remain inconclusive)<br>Comparator – 1131  |
|                        | <i>E.coli</i> O157            | Culture                                                                                                                                                    | Bi-directional sequencing analysis using analytically                                                                                                                                                                | GPP + 2                           | Comparator + 9 (verified 4+/0, 5 remain inconclusive)<br>Comparator –         |

| Study (GPP test) | Pathogen          | Comparator                                                                                                                                  | Verification method (judgement of bias)                                                                                                   | Reported results of verification* |                                                        |                                                                       |
|------------------|-------------------|---------------------------------------------------------------------------------------------------------------------------------------------|-------------------------------------------------------------------------------------------------------------------------------------------|-----------------------------------|--------------------------------------------------------|-----------------------------------------------------------------------|
|                  |                   |                                                                                                                                             | validated primers that targeted genomic regions distinct from the xTAG GPP (biased)                                                       | GPP -                             | 0                                                      | 1158                                                                  |
|                  | ETEC              | Composite consisting of PCR/sequencing directly from clinical specimen using four PCR/sequencing assays                                     | Bi-directional sequencing analysis using analytically validated primers that targeted genomic regions distinct from the xTAG GPP (biased) | GPP +<br>GPP -                    | Comparator +<br>2 (verified 2+/0)<br>6 (verified 6+/0) | Comparator –<br>4<br>1156                                             |
|                  | Norovirus         | Composite consisting of CDC real-time PCR and conventional PCR followed by bi-directional sequencing assays directly from clinical specimen | Validated PCR/sequencing assays (biased)                                                                                                  | GPP +<br>GPP -                    | Comparator +<br>74<br>4 (verified 0/4-)                | Comparator –<br>96<br>1023                                            |
|                  | <i>Salmonella</i> | Culture                                                                                                                                     | Bi-directional sequencing analysis using analytically validated primers that targeted genomic regions distinct from the xTAG GPP (biased) | GPP +<br>GPP -                    | Comparator +<br>10<br>0                                | Comparator –<br>18 (verified 2+/0,<br>16 remain inconclusive)<br>1143 |
|                  | <i>Shigella</i>   | Culture                                                                                                                                     | Bi-directional sequencing analysis using analytically validated primers that targeted genomic regions distinct from the xTAG GPP (biased) | GPP +<br>GPP -                    | Comparator +<br>2<br>0                                 | Comparator –<br>17 (verified 2+/0,<br>15 remain inconclusive)<br>1154 |
|                  | STEC              | Broth enrichment followed by rapid immunoassay                                                                                              | Bi-directional sequencing analysis using analytically validated primers that targeted                                                     | GPP +<br>GPP -                    | Comparator +<br>1<br>0                                 | Comparator –<br>16 (verified 1+/0,<br>15 remain inconclusive)<br>1153 |

| Study (GPP test)                                                                                                                                                                                                                                                                                                                                                                                                                                                                                                                                                                                                                                                                                                                                                                                                              | Pathogen                          | Comparator       | Verification method (judgement of bias)                  | Reported results of verification* |                                            |                                                         |
|-------------------------------------------------------------------------------------------------------------------------------------------------------------------------------------------------------------------------------------------------------------------------------------------------------------------------------------------------------------------------------------------------------------------------------------------------------------------------------------------------------------------------------------------------------------------------------------------------------------------------------------------------------------------------------------------------------------------------------------------------------------------------------------------------------------------------------|-----------------------------------|------------------|----------------------------------------------------------|-----------------------------------|--------------------------------------------|---------------------------------------------------------|
|                                                                                                                                                                                                                                                                                                                                                                                                                                                                                                                                                                                                                                                                                                                                                                                                                               |                                   |                  | genomic regions distinct from the xTAG GPP (biased)      |                                   |                                            |                                                         |
| Pankhurst 2014[16] (xTAG)                                                                                                                                                                                                                                                                                                                                                                                                                                                                                                                                                                                                                                                                                                                                                                                                     | Campylobacter                     | Culture          | single qPCR: primers probably different to xTAG (biased) | GPP +                             | Comparator + 110                           | Comparator – 11 (verified 11+/0)                        |
|                                                                                                                                                                                                                                                                                                                                                                                                                                                                                                                                                                                                                                                                                                                                                                                                                               |                                   |                  |                                                          | GPP -                             | 7 (verified 3+/0, 4 remain inconclusive)   | 711                                                     |
|                                                                                                                                                                                                                                                                                                                                                                                                                                                                                                                                                                                                                                                                                                                                                                                                                               | <i>C. difficile</i> toxin A and B | EIA plus culture | single qPCR: primers probably different to xTAG (biased) | GPP +                             | Comparator + 195                           | Comparator – 19 (verified 15+/0, 4 remain inconclusive) |
|                                                                                                                                                                                                                                                                                                                                                                                                                                                                                                                                                                                                                                                                                                                                                                                                                               |                                   |                  |                                                          | GPP -                             | 4 (verified 2+/0, 2 remain inconclusive)   | 621                                                     |
|                                                                                                                                                                                                                                                                                                                                                                                                                                                                                                                                                                                                                                                                                                                                                                                                                               | Norovirus                         | Quantitative PCR | single qPCR (biased)                                     | GPP +                             | Comparator + 183                           | Comparator – 16 (verified 7+/0, 9 remain inconclusive)  |
|                                                                                                                                                                                                                                                                                                                                                                                                                                                                                                                                                                                                                                                                                                                                                                                                                               |                                   |                  |                                                          | GPP -                             | 16 (verified 6+/0, 10 remain inconclusive) | 624                                                     |
|                                                                                                                                                                                                                                                                                                                                                                                                                                                                                                                                                                                                                                                                                                                                                                                                                               | <i>Salmonella</i>                 | Culture          | single qPCR: primers probably different to xTAG (biased) | GPP +                             | Comparator + 15                            | Comparator – 9 (verified 0+/0, 9 remain inconclusive)   |
|                                                                                                                                                                                                                                                                                                                                                                                                                                                                                                                                                                                                                                                                                                                                                                                                                               |                                   |                  |                                                          | GPP -                             | 18 (verified 10+/0, 8 remain inconclusive) | 797                                                     |
| ECP enhanced comparator protocol (original molecular comparator assays with enhanced methods, including up to 10 additional PCR cycles and up to 10 additional replicate samples); BTFA benchtop version of the FilmArray GI Panel assay (FilmArray primers in a conventional real-time PCR) followed by amplicon sequencing; GPP gastrointestinal pathogen panel; qPCR quantitative polymerase chain reaction; EIA enzyme immunoassay; <i>C. difficile</i> <i>Clostridium difficile</i> ; ETEC Enterotoxigenic <i>Escherichia coli</i> ; E.coli O157 <i>Escherichia coli</i> O157; STEC Shiga toxin-producing <i>Escherichia coli</i> ; EAEC Enteroaggregative <i>Escherichia coli</i> ; EPEC Enteropathogenic <i>Escherichia coli</i> ; (green – verification in favour of GPP, red – verification in favour of comparator) |                                   |                  |                                                          |                                   |                                            |                                                         |

\*Reported results of verification is presented as 2x2 comparison table for GPP and routine testing. Interpretation is as follows using Buss 2015, adenovirus as an example: 42 positive results and 1499 negative results were in agreement using both methods. Thirteen discordant GPP positive/ comparator negative tests were verified using ECP and BFTA, 11 were found to be positive and 2 inconclusive using this third method. Two discordant GPP negative / comparator positive were verified using ECP and BFTA, 1 was found to be positive and 1 was inconclusive using this third method.

\*\* Inconclusive – discrepant analysis did not help identify the underlying cause of the discrepancy
